# Supplementary material for: A novel MoS2-based hybrid film as the back electrode for high-performance thin film solar cells
Source: Royal Society of Chemistry journal article supplement (doi:10.1039/c7ra03233a), 2017-01-01
Supplement: c7ra03233a1.pdf [file c7ra03233a1.pdf]

Electronic Supporting Information

## Novel MoS<sub>2</sub>-based hybrid film as the back electrode for high-performance thin film solar cells

Sheng Yuan, Ming-Jian Zhang, Xiaoyang Yang, Zongwei Mei, Yongji Chen and Feng Pan\*

School of Advanced Materials, Peking University Shenzhen Graduate School, Shenzhen 518055 (China)

E-mail: [panfeng@pkusz.edu.cn](mailto:panfeng@pkusz.edu.cn) (F.P)

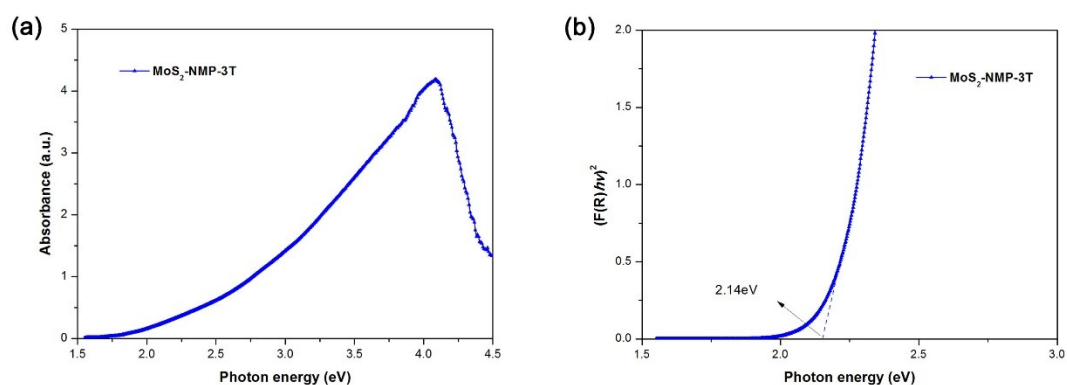

**Figure S1.** (a) The UV-Vis absorption spectrum of MoS<sub>2</sub>-NMP films (MoS<sub>2</sub>-NMP-3T) which was prepared by spin-coating MoS<sub>2</sub>-NMP solution three times; (b) plots of  $(F(R)hv)^2$  versus photon energy ( $h\nu$ ) for estimation of the band gaps of MoS<sub>2</sub>-NMP films according to the direct band gap (because single layer MoS<sub>2</sub> is a direct band gap semiconductor)

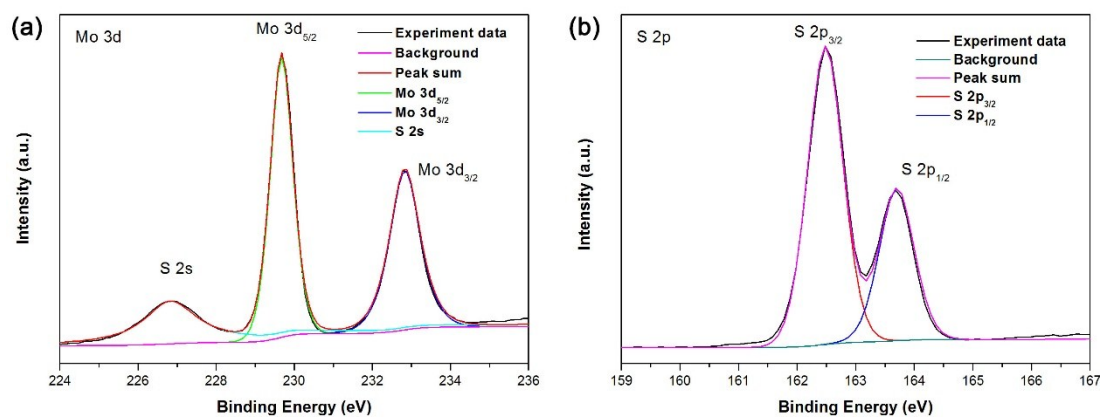

**Figure S2.** XPS spectra of (a) Mo 3d and (b) S 2p for pure MoS<sub>2</sub> powder.

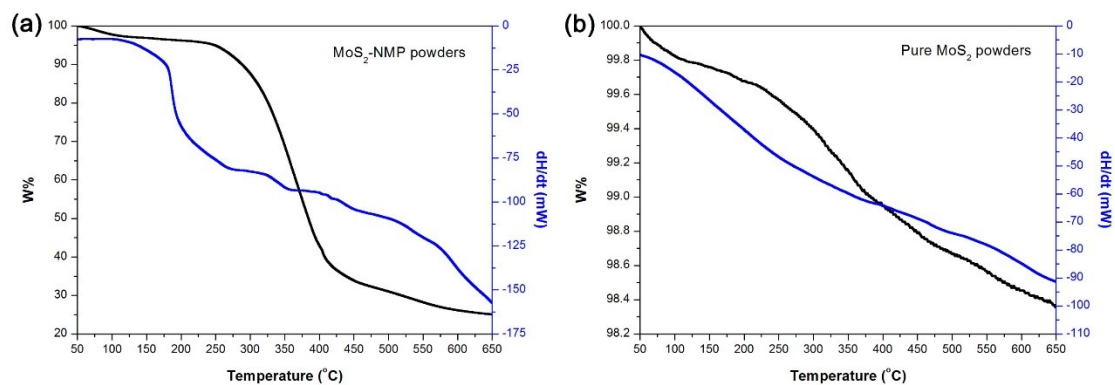

Figure S3. (a) The TG and DSC curves of MoS<sub>2</sub>-NMP powder. (b) the TG and DSC curves of raw materials MoS<sub>2</sub>.

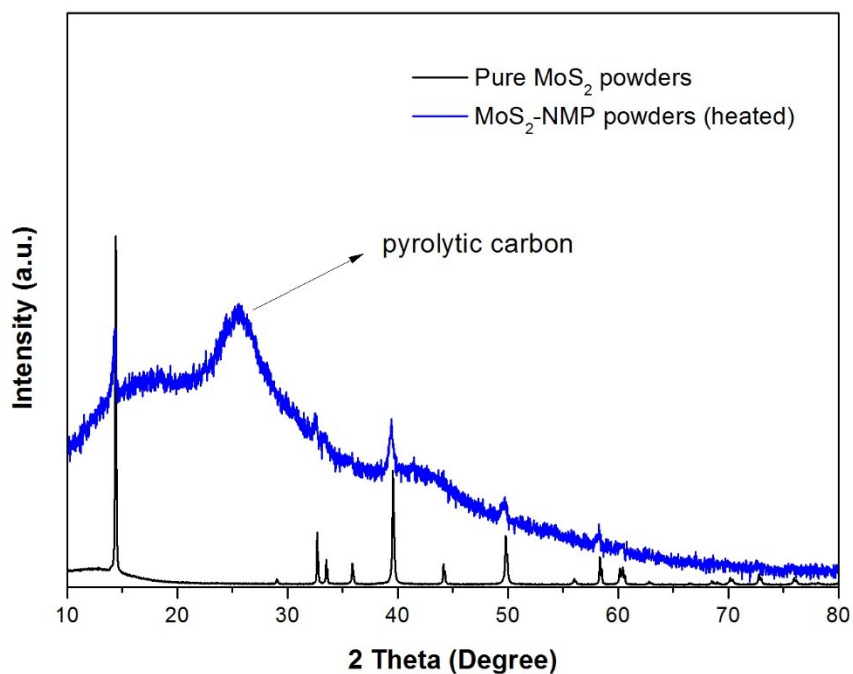

Figure S4. The powder X-ray diffraction pattern of MoS<sub>2</sub>-NMP after the thermal treatment at 430°C for 40 min in an Ar-filled glovebox.

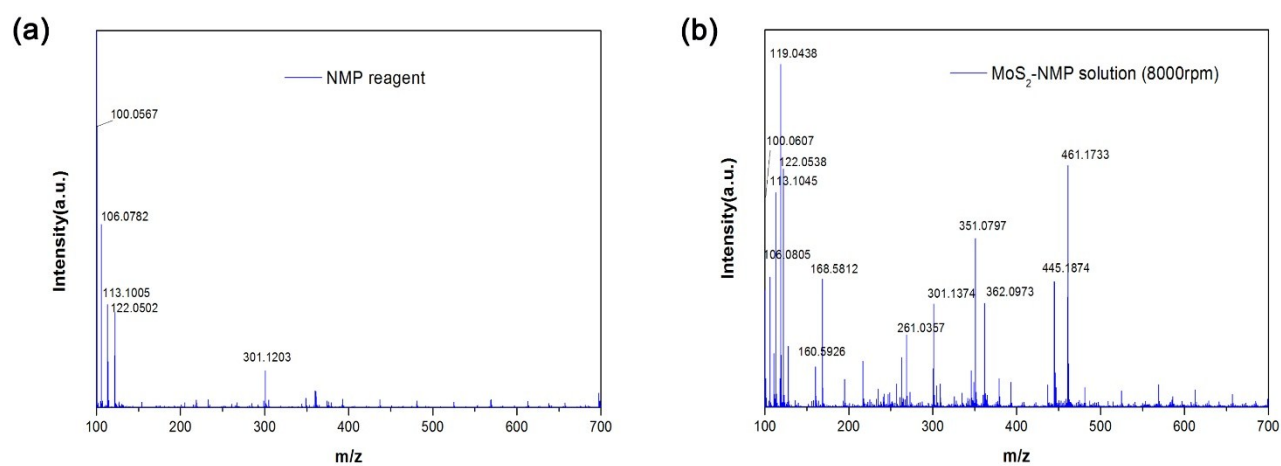

**Figure S5.** The mass spectra of pure NMP reagent (a) and MoS<sub>2</sub>-NMP solution (b).

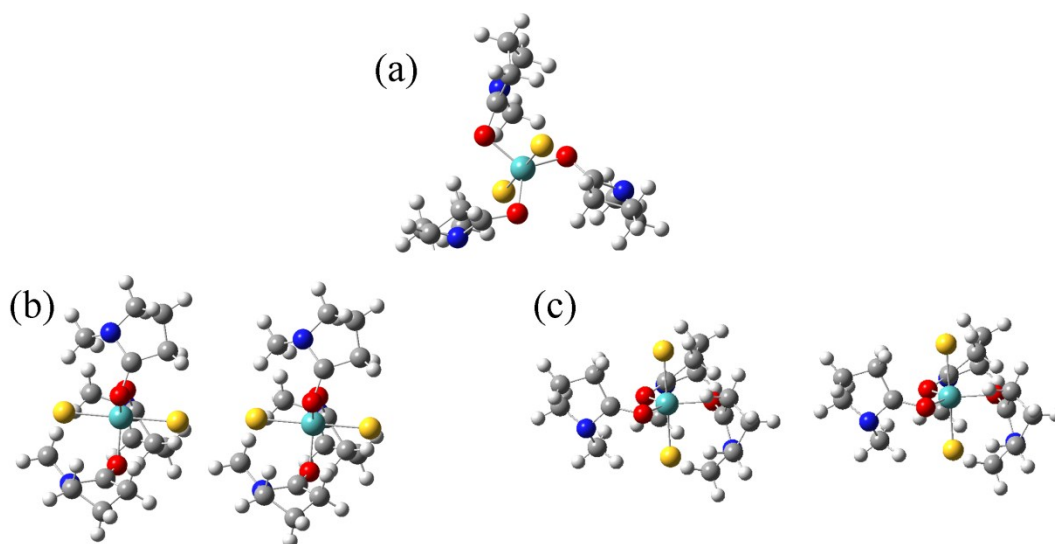

**Figure S6.** Three proposed models for the structure of MoS<sub>2</sub>(NMP)<sub>3</sub>. (a) one molecule of MoS<sub>2</sub>(NMP)<sub>3</sub>; (b) the serial stacking of two MoS<sub>2</sub>(NMP)<sub>3</sub> molecules; (c) the parallel stacking of two MoS<sub>2</sub>(NMP)<sub>3</sub> molecules.

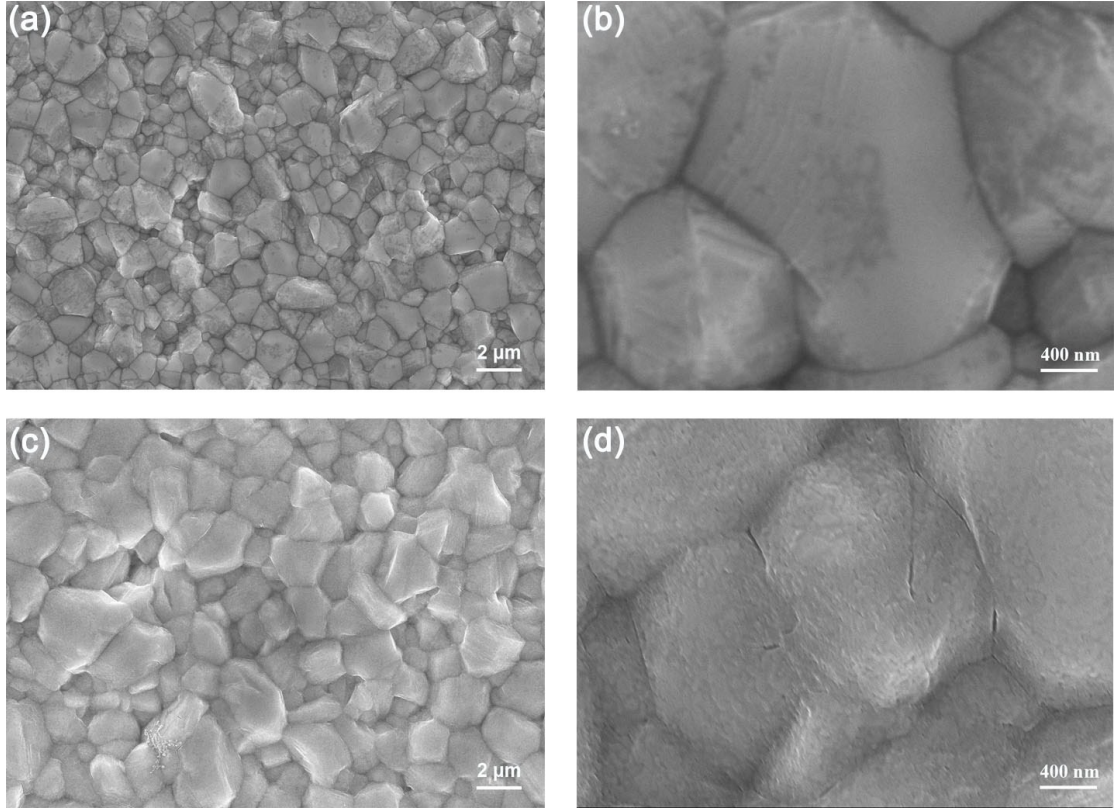

**Figure S7.** (a) Low and (b) high magnification SEM images of the surface for traditional CdTe solar cell with a FTO/CdS/CdTe/Cu/Au configuration; (c) Low and (d) high magnification SEM images of the surface when adopting MoS<sub>2</sub>-based thin film as the back contact.

**The calculation detail for the work function of MoS<sub>2</sub>-based thin film:**

$$\Phi_{\text{MoS}_2\text{-NMP}} - \Phi_{\text{tip}} = -eV_{\text{CPD2}} = 0.13\text{eV}$$

$$\Phi_{\text{Au}} - \Phi_{\text{tip}} = -eV_{\text{CPD1}} = 0.03\text{eV}$$

$$\Phi_{\text{MoS}_2\text{-NMP}} - \Phi_{\text{Au}} = -e(V_{\text{CPD2}} - V_{\text{CPD1}}) = 0.1\text{eV}$$

$$\Phi_{\text{Au}} = 5.32\text{eV}$$

$$\Phi_{\text{MoS}_2\text{-NMP}} = 5.42\text{eV}$$
